# Supplementary material for: Field induced anomalous spreading, oscillation, ejection, spinning, and breaking of oil droplets on a strongly slipping water surface
Source: Royal Society of Chemistry journal article supplement (doi:10.1039/c6fd00233a), 2016-12-21
Supplement: c6fd00233a1.pdf [file c6fd00233a1.pdf]

## Electronic Supporting Information

# Field Induced Anomalous Spreading, Oscillation, Ejection, Spinning, and Breaking of Oil Droplets on Strongly Slipping Water Surface

Sunny Kumar,<sup>a</sup> Bhaskarjyoti Sarma,<sup>c</sup> Ahsok Kumar Dasmahapatra,<sup>a,b</sup>, Amaresh Dalal,<sup>c</sup>  
Dipankar Narayan Basu,<sup>c</sup> and Dipankar Bandyopadhyay\*<sup>a,b</sup>

<sup>a</sup>Department of Chemical Engineering, Indian Institute of Technology Guwahati, India

<sup>b</sup>Centre for Nanotechnology, Indian Institute of Technology Guwahati, India

<sup>c</sup>Department of Mechanical Engineering, Indian Institute of Technology Guwahati, India

**Keywords:** droplet, microfluidics, electric field, magnetic field, electrowetting.

Corresponding Author: [dipban@iitg.ernet.in](mailto:dipban@iitg.ernet.in)

**Table SI:** Physical properties of the experimental materials and fluid<sup>1-7</sup>

| Properties                   |            | Water | Teflon | Silicon oil          | Oleic acid | Hexadecane |
|------------------------------|------------|-------|--------|----------------------|------------|------------|
| Dielectric constant          | $\epsilon$ | 80    | 2      | 2.5                  | 2.5        | 2.1        |
| Surface tension (mN/m)       | $\gamma$   | 72    | -      | 21                   | 42         | 27         |
| Interfacial tension (mN/m)   |            | -     | -      | 24                   | 64         | 52         |
| Density (kg/m <sup>3</sup> ) | $\rho$     | 1000  | -      | 971                  | 895        | 770        |
| Viscosity (Pa s)             | $\mu$      | 0.001 | -      | 0.33                 | 0.027      | 0.003      |
| Conductivity ( $\mu$ S/m)    | $\sigma$   | 5.6   | -      | $0.8 \times 10^{-6}$ | $10^{-6}$  | $10^{-6}$  |

**Supporting Video 1. Expansion:** The video shows the expansion or spreading of the oil droplet for the EWOL setup, as shown in Figure 1a. Here a 1  $\mu$ l hexadecane droplet expanded on the water surface when we abruptly applied 500 V.

**Supporting Video 2. Oscillation:** The video shows the oscillation of an oil droplet on the EWOL setup shown in Figure 1b. Here a 1  $\mu\text{l}$  of hexadecane droplet expanded and then oscillated on the water surface when we abruptly applied 550 V.

**Supporting Video 3. Ejection:** The video corresponds to the EWOL experimental setup shown in Figure 1c in which 1  $\mu\text{l}$  of hexadecane droplet ejected out of the electric field when we abruptly applied the 800 V.

**Supporting Video 4. Expansion, Oscillation and Ejection of droplet:** The video shows simultaneous expansion, oscillation, and ejection of the oil droplet in the EWOL setup when the applied potential was progressively increased at a rate of 8 V/s.

**Supporting Video 5. Clockwise and Anti-Clockwise Rotation:** The video corresponds to the setup shown in the Figure 1d, where the EWOL experiments were conducted on a permanent magnet. The video shows clockwise and anticlockwise rotational motions with the change in the direction of the magnet.

**Supporting Video 6. Droplet Breaking:** The video corresponds to the EWOL experiments on a magnet, as schematically shown in the Figure 1d. In this situation, the spreading due to the rotation of the droplet and the shear at the oil-water interface led to the droplet breakup.

## References

1. E. A. van Nierop, A. Ajdari and H. A. Stone, *Phys. Fluids*, 2006, **18**, 038105, 1-4.
2. P. Than, L. Preziosi, D. D. Joseph and M. Arney, *J. Colloid Interface Sci.*, 1988, **124**, 552-559.
3. H. B. d. Aguiar, A. G. F. d. Beer, M. L. Strader and S. Roke, *J. Am. Chem. Soc.*, 2010, **132**, 2122-2123.
4. P. Ehrlich, *J. Res. Natl. Stand.* 1953, **51**, 185-188.
5. C. G. Malmberg and A. A. Maryott, *J. Res. Natl. Bur. Stand.* 1956, **56**, 1-8.
6. S. Mhatre and R. Thaokar, *Ind. Eng. Chem. Res.*, 2014, **53**, 13488-13496.
7. US patent, US 6274067 B1, 2001.
